# Supplementary material for: The Nr4a family regulates intrahepatic Treg proliferation and liver fibrosis in MASLD models
Source: PubMed Central journal article supplement (PMC11601941; doi:10.1172/jci175305), 2024-10-15
Supplement: jci-134-175305-s125.pdf [file jci-134-175305-s125.pdf]

Supplemental Figure 2F  
anti-GAPDH

$\alpha$ -GAPDH

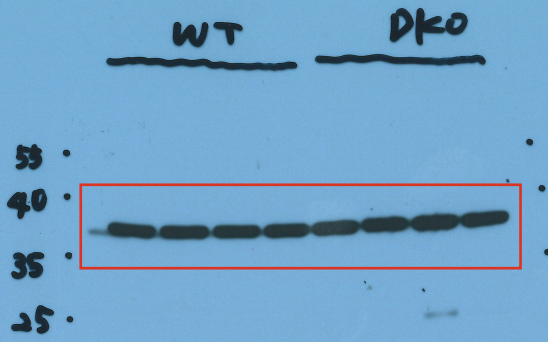

Supplemental Figure 2F  
anti-SMA

$\alpha$ -SMA

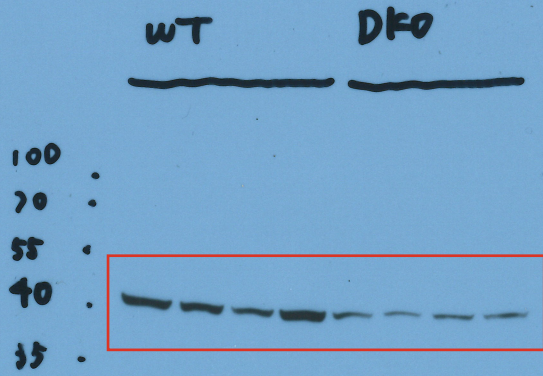

Supplemental Figure 4B  
anti-GAPDH

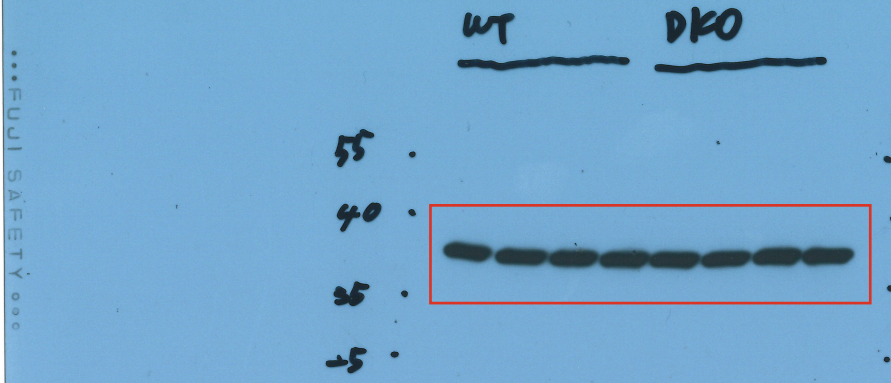

$\alpha$ -GAPDH  
CD8cre  
CDHFD

$\alpha$ -SMA

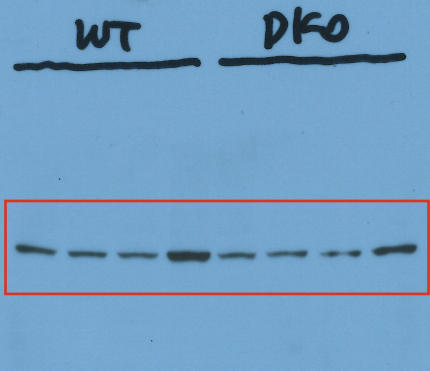

CD8cre CDHFD

Supplemental Figure 4B  
anti-SMA

0920  
2022
